# Supplementary material for: integRATE: a desirability-based data integration framework for the prioritization of candidate genes across heterogeneous omics and its application to preterm birth
Source: BMC Med Genomics. 2018 Nov 19;11:107. doi: 10.1186/s12920-018-0426-y (PMC6245874; doi:10.1186/s12920-018-0426-y)
Supplement: Supplementary file 13 — GO-Slim gene set enrichment results. The PANTHER output for gene set functional enrichment is provided, including 37 statistically enriched biological pathways. (XLSX 13 kb) [file 12920_2018_426_MOESM13_ESM.xlsx]

## Sheet: analysis (2)
Analysis Type:	PANTHER Overrepresentation Test (Released 20171205)
Annotation Version and Release Date:	PANTHER version 13.0 Released 2017-11-12
Analyzed List:	Client Text Box Input (Homo sapiens)
Reference List:	Homo sapiens (all genes in database)
Test Type:	FISHER
PANTHER GO-Slim Biological Process	Homo sapiens - REFLIST (21042)	Client Text Box Input (8082)	Client Text Box Input (expected)	Client Text Box Input (over/under)	Client Text Box Input (fold Enrichment)	Client Text Box Input (raw P-value)	Client Text Box Input (FDR)
sensory perception of smell (GO:0007608)	240	0	92.18	-	< 0.01	1.71e-34	4.18e-32
sensory perception of chemical stimulus (GO:0007606)	280	4	107.54	-	0.04	6.18e-34	7.54e-32
Unclassified (UNCLASSIFIED)	10635	3483	4084.79	-	0.85	4.27e-30	3.47e-28
metabolic process (GO:0008152)	5416	2620	2080.23	+	1.26	1.32e-29	8.06e-28
cellular process (GO:0009987)	7905	3617	3036.22	+	1.19	5.01e-29	2.44e-27
primary metabolic process (GO:0044238)	4346	2093	1669.25	+	1.25	1.52e-21	6.17e-20
nitrogen compound metabolic process (GO:0006807)	2435	1213	935.26	+	1.3	6.23e-15	2.17e-13
sensory perception (GO:0007600)	409	61	157.09	-	0.39	1.16e-14	3.52e-13
nucleobase-containing compound metabolic process (GO:0006139)	2050	1033	787.38	+	1.31	1.24e-13	3.36e-12
B cell mediated immunity (GO:0019724)	87	0	33.42	-	< 0.01	7.37e-13	1.8e-11
complement activation (GO:0006956)	86	0	33.03	-	< 0.01	1.26e-12	2.79e-11
biosynthetic process (GO:0009058)	1659	850	637.2	+	1.33	2.05e-12	4.16e-11
cell recognition (GO:0008037)	92	1	35.34	-	0.03	3.33e-12	6.26e-11
defense response to bacterium (GO:0042742)	104	5	39.95	-	0.13	5.91e-10	1.03e-08
catabolic process (GO:0009056)	1127	590	432.87	+	1.36	6.46e-10	1.05e-08
RNA metabolic process (GO:0016070)	1023	533	392.92	+	1.36	7.87e-09	1.2e-07
phosphate-containing compound metabolic process (GO:0006796)	858	453	329.55	+	1.37	3.74e-08	5.37e-07
organelle organization (GO:0006996)	1152	582	442.47	+	1.32	4.21e-08	5.71e-07
cellular protein modification process (GO:0006464)	799	425	306.89	+	1.38	4.89e-08	6.28e-07
G-protein coupled receptor signaling pathway (GO:0007186)	470	103	180.52	-	0.57	5.18e-08	6.32e-07
cellular component organization or biogenesis (GO:0071840)	1685	809	647.19	+	1.25	7.31e-08	8.49e-07
immune response (GO:0006955)	355	71	136.35	-	0.52	7.83e-08	8.68e-07
neurological system process (GO:0050877)	816	212	313.42	-	0.68	9.84e-08	1.04e-06
protein transport (GO:0015031)	720	380	276.54	+	1.37	5.14e-07	5.23e-06
cellular component organization (GO:0016043)	1543	737	592.65	+	1.24	5.78e-07	5.65e-06
intracellular protein transport (GO:0006886)	688	365	264.25	+	1.38	6.11e-07	5.74e-06
intracellular signal transduction (GO:0035556)	1000	503	384.09	+	1.31	6.48e-07	5.86e-06
protein metabolic process (GO:0019538)	1714	804	658.33	+	1.22	1.41e-06	1.23e-05
developmental process (GO:0032502)	1569	741	602.64	+	1.23	1.81e-06	1.47e-05
anatomical structure morphogenesis (GO:0009653)	470	262	180.52	+	1.45	1.76e-06	1.48e-05
response to biotic stimulus (GO:0009607)	147	21	56.46	-	0.37	2.44e-06	1.92e-05
localization (GO:0051179)	1970	904	756.66	+	1.19	4.02e-06	3.07e-05
regulation of phosphate metabolic process (GO:0019220)	479	260	183.98	+	1.41	8.11e-06	6e-05
system process (GO:0003008)	910	259	349.52	-	0.74	9.06e-06	6.5e-05
transport (GO:0006810)	1668	767	640.66	+	1.2	2.07e-05	0.000144
regulation of nucleobase-containing compound metabolic process (GO:0019219)	1151	545	442.09	+	1.23	4.45e-05	0.000301
cellular component morphogenesis (GO:0032989)	339	189	130.21	+	1.45	5.5e-05	0.000363
cell death (GO:0008219)	460	243	176.68	+	1.38	7.09e-05	0.000444
death (GO:0016265)	460	243	176.68	+	1.38	7.09e-05	0.000455
apoptotic process (GO:0006915)	440	233	169	+	1.38	8.58e-05	0.000523
protein localization (GO:0008104)	484	252	185.9	+	1.36	0.000103	0.00061
cell cycle (GO:0007049)	814	396	312.65	+	1.27	0.000107	0.000623
cytoskeleton organization (GO:0007010)	379	204	145.57	+	1.4	0.000123	0.000699
MAPK cascade (GO:0000165)	329	180	126.37	+	1.42	0.000173	0.000962
cellular component biogenesis (GO:0044085)	504	258	193.58	+	1.33	0.000187	0.00101
mRNA processing (GO:0006397)	221	128	84.88	+	1.51	0.000294	0.00156
cell-cell signaling (GO:0007267)	513	143	197.04	-	0.73	0.000486	0.00252
vesicle-mediated transport (GO:0016192)	800	380	307.27	+	1.24	0.000623	0.0031
transcription from RNA polymerase II promoter (GO:0006366)	192	112	73.75	+	1.52	0.000615	0.00313
transmembrane receptor protein tyrosine kinase signaling pathway (GO:0007169)	151	92	58	+	1.59	0.000683	0.00333
transcription, DNA-dependent (GO:0006351)	485	243	186.28	+	1.3	0.000786	0.00376
regulation of transcription from RNA polymerase II promoter (GO:0006357)	548	268	210.48	+	1.27	0.00114	0.00536
regulation of molecular function (GO:0065009)	412	207	158.24	+	1.31	0.00172	0.00794
regulation of catalytic activity (GO:0050790)	338	173	129.82	+	1.33	0.00233	0.0105
cell differentiation (GO:0030154)	459	226	176.3	+	1.28	0.00248	0.011
carbohydrate metabolic process (GO:0005975)	344	175	132.13	+	1.32	0.00254	0.0111
RNA splicing (GO:0008380)	150	87	57.61	+	1.51	0.00274	0.0117
RNA splicing, via transesterification reactions (GO:0000375)	139	81	53.39	+	1.52	0.00317	0.0133
tRNA metabolic process (GO:0006399)	112	68	43.02	+	1.58	0.00339	0.014
cytokinesis (GO:0000910)	131	77	50.32	+	1.53	0.0039	0.0154
signal transduction (GO:0007165)	2162	925	830.4	+	1.11	0.00384	0.0154
sensory perception of taste (GO:0050909)	40	4	15.36	-	0.26	0.00379	0.0154
phagocytosis (GO:0006909)	178	43	68.37	-	0.63	0.00517	0.02
negative regulation of apoptotic process (GO:0043066)	98	60	37.64	+	1.59	0.00556	0.0205
phospholipid metabolic process (GO:0006644)	177	97	67.98	+	1.43	0.00539	0.0206
protein targeting (GO:0006605)	160	89	61.45	+	1.45	0.00553	0.0208
proteolysis (GO:0006508)	420	204	161.32	+	1.26	0.00583	0.0212
mRNA splicing, via spliceosome (GO:0000398)	161	89	61.84	+	1.44	0.00689	0.0247
lipid metabolic process (GO:0006629)	572	265	219.7	+	1.21	0.0121	0.0429
transcription initiation from RNA polymerase II promoter (GO:0006367)	48	33	18.44	+	1.79	0.0124	0.0433
protein phosphorylation (GO:0006468)	80	49	30.73	+	1.59	0.0133	0.0458
